# Supplementary material for: The transcription factor RFX5 coordinates antigen-presenting function and resistance to nutrient stress in synovial macrophages
Source: Springer Nature journal article supplement (doi:10.1038/s42255-022-00585-x), 2022-06-23
Supplement: MOESM1 [file 42255_2022_585_MOESM1_ESM.xlsx]

## Sheet: Suplementary Table 1
Supplementary Table 1. Demographic and clinical characteristics of RA patients
Parameters	N=144
Age (mean ± SD)	57.4 ± 14.8
Female	0.736
Ethnicity
Caucasian	0.583
African-American	0.077
Asian	0.132
Hispanic	0.208
Clinical characteristics
Disease duration (mean ± SD, years)	7.3 ± 5.6
Active disease (%)	100
CDAI (mean ± SD)	12.7 ± 6.6
Extra-articular manifestations (%)	20.8
Interstitial lung disease (%)	6.3
Treatment
Untreated at the time of enrollment	0.194
DMARD naive	0.042
Corticosteroids	0.138
Methotrexate	0.389
Hydroxychloroquine	0.159
TNF inhibitors	0.243
Other DMARDS	0.277

## Sheet: Supplementary Table 2
Supplementary Table 2. Primer sequences
Target gene	Primer sequence (5'->3')
Human	Forward primer	Reverse primer
CCL18	AAGGAGGCCAGGAGTTGTGA	GGAGGTATAGACGAGGCAGC
RFX5	TCTAATTTTCGGAGAAGGCAAGT	CCTGAGGGGAGCTGAAGGTA
CTCF	GCCATTTTGTGTCTGAGCCTG	TGTCCACTAGCGCATCTTGTT
EP300	ACCAGGAATGACTTCTAGTTTGA	TGGAAGGCTGTTGCATACGA
UBTF	GCTGCGGCTCGACTGTTC	GCATTCCAGCAAAGTCAGCAT
MAX	GGAGAGCGACGCTGACAAA	GCTTGAAATGAAGGTGTGGCA
GABPA	AGGAAGTGGAGGGACTGATCC	GCTTACACATTCAGCTGGCG
TRIM22	AGATCTCCAGCGGAGGTTGA	AACTTGCAGCATCCCACTCA
CUX1	GCCAATGTGGGATCGATGTT	CTGCTTGCGCAAATCCTCTG
CHD1	TCGCCCTTGGTGCTTCAATA	CTCGGGGTAAGCAAGAGTCC
ZNF207	GGTGTTCCTCCTCTGATGCC	CACCGCAAAATGACTGGGTG
STAT5A	CCTGTGGTTGTCATCGTCCA	CACAGCACTTTGTCAGGCAC
NBN	AGGTGGGGAAGCTAGGTTGA	TGGCCCTGAGGATCACAGTA
NRF1	TCCTGGTCCAGAACTTTACACA	TTTGGGTCACTCCGTGTTCC
RAD21	ATCCCGTTGAACCAATGCCA	CAATTTCTTGGTGGGCGGTG
ASH2L	GTGATGGATACTCAGGCGGG	TTCCCACTGTGATGGCAGAC
ARID3A	AGCATTCGGATCAACAGCCA	CCGTTGATCTCCACCGACAT
HCFC1	AAAGTGGCCACACACGAGAA	ACTCCAAATGTACAGGCGGG
MTA2	GTTTCCTCTTCCCAGGCGTT	CCCTGGCTGCTTTGATTCCT
IKZF2	ACTGCAGTGCACAAACACAC	ACCATTTCCAGCTCTGTCGG
IKZF1	TGGCAGGGCAGAGGGAG	GCCCTCATCTGGAGTATCGC
SLC7A5	TATACAGCGGCCTCTTTGCC	TTGGTCAGCACGTACACCAG
SLC7A8	GCTGGTGTGTCCTTGGAAGAG	GGAACAGTTGACCCATGTGAG
SLC38A1	AATGGCCTGTCCGCGTTAAA	AGCTTGACACCCCTGTTAGC
SLC38A2	CTCCTACCCCACCAAGCAAG	ACCCTCCTTCATTGGCAGTC
SLC1A4	TTCCGTACGTATGCAACCGA	GGTCGCTGAGCACATAATCC
SLC1A5	GCAGCCTTTCGCTCATACTC	CCCAGGATGTTCATCCCCTC
GLS	TGGGCAACAGTGTTAAGGGA	GTCCTCATTTGACTCAGGTGACA
GLS-2	AAGTTTGTGGGCAAAGAGCC	GGGAAAAATTACCTTCCGTGGC
GLUD1	TTCTTGGGCTTTTGTATCCGT	CATGTCTGGAGCAGGCACAT
GLUD2	TCTGAGAAAGCGCACCTGTT	AGGTAGCGGTACATCGCGG
GOT1	CTCAGCCTATCAGGGCTTCG	ACTGGGCACAGAAGAACTCG
GOT2	TGGTGCCTACCGGGATGATA	GGCAGAAAGACATCTCGGCT
AST	TCATATGCAGGAGCACAGCTT	ACGGCACTGACTTCTGTGAA
GS	TCATATGCAGGAGCACAGCTT	ACGGCACTGACTTCTGTGAA
HLA-DR	TGGAGTCCCTGTGCTAGGAT	CAAAGCTGGCAAATCGTCCA
TCR	CCTTCAACAACAGCATTATTCCAG	CGAGGGAGCACAGGCTGTCTT
TBET	CGGATGTTCCCATTCCTGTC	TTCCACACTGCACCCACTTG
IFNγ	ACTAGGCAGCCAACCTAAGCAAGA	CATCAGGGTCACCTGACACATTCA
RORG	TGCCAGAATGACCAGATTGTG	ATGCCACCGTATTTGCCTTC
IL-17	CAGGATGCCCAAATTCTGAGG	CAAGGTGAGGTGGATCGGTT
IL-21	TCCTGGCAACATGGAGAGGATTGT	AGCTGGCAGAAATTCAGGGACCAA
IL-1β	ATCCAGCTACGAATCTCCGA	CCACTTGTTGCTCCATATCC
TNFα	CGCATCGCCGTCTCCTACCA	AGGGCAATGATCCCAAAGTA
IL-10	GACTTTAAGGGTTACCTGGGTTG	TCACATGCGCCTTGATGTCTG
NUPR1	GCCCACTTCACCTCTGACTC	AGCTTCTCTCTTGGTGCGAC
C1QA	GAGTTGACAACAGGAGGCAG	TAAGGCCTTGGATGCCTGTC
β-Actin	TGGAACGGTGAAGGTGACAG	AACAACGCATCTCATATTTGGAA
GLUD1(CHIP)	GTGAGCTGGAAGGGAGTCAC	CCACGACGTGCGTAACTATG

## Sheet: Supplementary Table 3
Supplementary Table 3. Reagents
Reagent	Conjugation	Catalog	Manufacturer
GLUD1	-	12793S	Cell Signaling TECHNOLOGY
RFX5	-	200-401-194	Rockland
CCL18	-	sc-374438	SANTA CRUZ BIOTECHNOLOGY
CCL18	AF488	IC394G-100UG	R&D
β-Actin	-	3700S	Cell Signaling TECHNOLOGY
CD3	-	ab5690	Abcam
IFNγ	-	MAB285-100	R&D
CD68	-	PA5-32331	Thermo Fisher Scientific
HLA-DR	-	MA511966	Thermo Fisher Scientific
HLA-DR	Pacific Blue	307633	Biolegend
CD3	BV421	344834	Biolegend
CD3	FITC	344804	Biolegend
CD3	PE-Cy7	300419	Biolegend
CD4	PE-Cy7	357410	Biolegend
CD19	BV711	302245	Biolegend
Podoplanin	BV421	566456	BD Biosciences
CD45	PerCP	304026	Biolegend
CD45	PE-Cy7	368532	Biolegend
CD68	PE	333808	Biolegend
CD68	BV785	333826	Biolegend
CD206	BV510	321138	Biolegend
CD163	BV711	333630	Biolegend
CD69	BV510	310935	Biolegend
CD154/CD40L	BV785	310842	Biolegend
Human TruStain FcX	-	422302	Biolegend
7-AAD Viability Staining Solution	-	420403	Biolegend
Zoombie UV Fixable viability	-	423107	Biolegend
L-Glutamic acid	-	49621-250G	Sigma
L-Glutamine	-	25-030-081	Thermo Fisher Scientific
LPS	-	L2630-25MG	Sigma
IL-4	-	Z02925-50	GenScript
GM-CSF	-	Z02695-50	GenScript
Recombinant Human M-CSF (carrier-free)	-	574806	Biolegend
Human IFN-gamma / IFNG / γ-IFN Protein	-	11725-HNAS-100	Sino Biological
Purified Mouse Anti-Human CD40	-	550391	BD Biosciences
R162	-	HY-103096	MedChem Express
rhCCL18	-	NBP2-35041-100ug	Novus Biologicals
CCL18 cDNA ORF clone, Homo sapiens(human)	-	NM_0029884	GenScript
GLUD1 cDNA ORF clone, Homo sapiens(human)	-	NM_005271.3	GenScript
RFX5 cDNA ORF clone, Homo sapiens(human)	-	NM_000449.3	GenScript
CCL18 siRNA	-	sc-60003	SANTA CRUZ BIOTECHNOLOGY
GLUD1 siRNA	-	sc-90633	SANTA CRUZ BIOTECHNOLOGY
RFX5 siRNA	-	sc-37747	SANTA CRUZ BIOTECHNOLOGY
Glutamine Assay Kit (Colorimetric)	-	ab197011	Abcam
Glutamate Assay Kit (Fluorometric)	-	ab138883	Abcam
Alpha-Ketoglutarate Kit (Colorimetric/Fluorometric)	-	K677-100	BioVision
Hematoxylin and Eosin Stain Kit	-	H-3502	VECTORLABORATORIES
Human PARC ELISA KIT	-	ELH-PARC-1	RayBiotech
Human Cytokine Array C6	-	AAH-CYT-6-4	RayBiotech
Goat anti-Rabbit IgG	HRP	7074S	Cell Signnalinng TECHNOLOGY
Goat anti-Mouse IgG	HRP	ab6789	Abcam
Goat Anti-mouse IgG	AF488	ab96879	Abacm
Goat Anti-mouse IgG	AF594	A-11032	Thermo Fisher Scientific
Goat Anti-Rabbit IgG	AF488	A-11034	Invitogen
Goat Anti-Rabbit IgG	AF594	A-11012	Thermo Fisher Scientific

## Sheet: Supplementary Table 4
Supplementary Table 4. Putative transcription factor for GLUD1. Sequences 1kb upstream of the GLUD1 Transcription Start Site were extracted as the potential promoter region, and those occupied by a H3K27Ac signal were chosen to predict TFs binding on the promoter region.
RBFOX2	POLR2A	POLR2G	NRF1	HDAC1	HNRNPK	NCOR1
IRF1	MEF2B	ZFX	PHF8	PRPF4	CLOCK	ZBTB7A
ZNF592	RNF2	RAD51	TAF1	BHLHE40	BRCA1	MITF
MXI1	SP1	BRD4	FOS	PHF20	CTCF	FIP1L1
FOXA1	FUS	ZNF316	EP300	ZNF24	EP400	REST
FOSL2	MBD2	EGR1	RXRA	AGO2	MNT	MGA
ATF7	HNRNPL	PRDM10	UBTF	DPF2	SKI	USF2
MAX	ZNF282	ZNF143	GABPA	ELF1	TRIM22	SMAD5
SAP30	ATF3	CTBP1	MTA3	MYC	YY1	SIN3A
PAX5	CUX1	L3MBTL2	ZBTB7B	SMARCA4	CHD1	ZHX2
SOX13	CREB3L1	RBM22	ZNF207	ETS1	NFATC1	EED
RBM14	RB1	GATA4	STAT5A	RFX5	ZNF687	SMARCA5
ZBTB33	GATAD2A	KLF5	NBN	E2F6	TCF12	JUND
NRF1	RAD21	PKNOX1	USF1	ASH2L	CREM	ATF2
ARID3A	HDAC2	MTA1	HCFC1	ZNF263	NEUROD1	ZSCAN29
MTA2	HNRNPLL	E4F1	RBM39	ESRRA	SIN3B	GATA3
IKZF2	CREB1	GATAD2B	POU2F2	ZBTB2	BCL11A	RELB
GMEB1	ZNF217	BCOR	IKZF1	RFX1	TBX3	ZNF579
TAF15	TBP	NFRXB	SAFB	MLLT1	BACH1	CC2D1A
ZBTB40

## Sheet: Supplementary Table 5
Supplementary Table 5. Transcription factors binding the GLUD1 promoter identified by ChIP-seq
MEF2B	RAD51	TAF1	BRCA1	MXI1	CTCF	EP300
REST	EGR1	RXRA	UBTF	DPF2	USF2	MAX
ZNF143	GABPA	ELF1	TRIM22	SMAD5	MTA3	YY1
SIN3A	PAX5	CUX1	CHD1	ZNF207	ETS1	NFATC1
EED	RB1	STAT5A	RFX5	ZBTB33	KLF5	NBN
TCF12	JUND	NRF1	RAD21	PKNOX1	ASH2L	CREM
ATF2	ARID3A	HDAC2	HCFC1	MTA2	E4F1	IKZF2
BCL11A	RELB	IKZF1	TBP	MLLT1	BACH1	ZBTB40

## Sheet: Supplementary Table 6
Supplementary Table 6. Transcription factors expressed in monocyte /macrophages
CTCF	EP300	RXRA	UBTF	DPF2	USF2	MAX
GABPA	ELF1	TRIM22	YY1	SIN3A	CUX1	CHD1
ZNF207	EED	RB1	STAT5A	RFX5	NBN	JUND
NRF1	RAD21	ASH2L	ARID3A	HDAC2	HCFC1	MTA2
E4F1	IKZF2	IKZF1	BACH1

## Sheet: Supplementary Table 7
Supplementary Table 7. Candidate transcription factors for the GLUD1 promoter
CTCF	EP300	UBTF	MAX	GABPA	TRIM22	CUX1
CHD1	ZNF207	STAT5A	RFX5	NBN	NRF1	RAD21
ASH2L	ARID3A	HCFC1	MTA2	IKZF2	IKZF1
