# Supplementary material for: The transcription factor RFX5 coordinates antigen-presenting function and resistance to nutrient stress in synovial macrophages
Source: Springer Nature journal article supplement (doi:10.1038/s42255-022-00585-x), 2022-06-23
Supplement: MOESM6 [file 42255_2022_585_MOESM6_ESM.xlsx]

## Sheet: Fig. 4
Fig. 4a	high/low	0.728522	0.727512	0.819485	0.815553	0.909128	0.909098	0.902908	0.889791	0.913102	0.761633	0.802555	0.851073	0.822566	0.693948	1.07949	1.07918	0.99457	0.906288	0.950755	0.993309	0.976401	1.16441	0.971202	0.684674	1.06807	1.06988	0.960643	1.167	0.858321	0.961353	0.976971	0.960606	1.16526	1.06679	1.06772	0.752237	1.06797	0.674051	0.682415	0.30139	0.82648	1.06766	1.06756	0.703445	1.05391	0.781328	1.0671	1.06663
Fig. 4b	Con	3.41429	3.32995	2.85181	2.90293	3.40659	2.79539	3.5044	2.97635	2.76373	3.57449
	RA	3.84147	3.80689	3.4647	3.93707	3.83953	3.53316	3.67889	3.46386	3.86573	3.83434	3.92153
Fig. 4c	low	0.400314	0.400314	0.251177	0.0941915	0.282575
	high	1.94662	3.17896	1.74254	1.82104	1.80534
Fig. 4f	CD68+ CCL18+	94.8454	91.9643	90.625	95.4545	92.233	92.3729	93.75	92.9825	94.382	93.2039	90.9091	94.9153	95.8333	96.3855	96.1165	96.6387	97.619	89.5238	98.2301	98.4	97.4359	94.7368	93.1818	95.7447	88.7324
	CD68+ CCL18-	5.15464	8.03571	9.375	4.54545	7.76699	7.62712	6.25	7.01754	5.61798	6.79612	9.09091	5.08475	4.16667	3.61446	3.8835	3.36134	2.38095	10.4762	1.76991	1.6	2.5641	5.26316	6.81818	4.25532	11.2676
Fig. 4g	low	1405	1736	1720	1040	1437	1450
	high	3040	2536	1865	1728	2014	2789	2583	2827	2255	1530	1443	1751	2654	2424
Fig. 4h		Con				RA
	CD4 T cell	0.000185	9.38e-05	2.53e-05	0.0002672	0.000341	0.000858	0.000436	0.000698
	CD8 T cell	0.000116	0.000133	2.2e-05	3.7e-05	0.000248	8.6e-05	0.000132	0.000199
	Neutro	0.000251	0.001785	0.000468	0.002213	0.005292	0.003846	0.006951	0.003979
	Mono	0.00075	0.000761	0.000874	0.000111	0.00283	0.004602	0.004255	0.003869
	Mϕ	0.00879	0.00109	0.00097	0.01136	0.03665	0.04091	0.0445	0.03931
	DCs	0.00016	0.00017	0.00066	0.00088	0.002978	0.012512	0.01105	0.008622
Fig. 4i	Con	13450	16790	20580	15620	17740	15080
	RA	6580	6780	7060	7000	3260	5150
Fig. 4j	Con	9.02	11.48	7.38	7.38	5.08
	RA	15.13	16.27	17.55	12.83	19.38	16.37	14.73
[truncated: 12 more columns]
