# Supplementary material for: The transcription factor RFX5 coordinates antigen-presenting function and resistance to nutrient stress in synovial macrophages
Source: Springer Nature journal article supplement (doi:10.1038/s42255-022-00585-x), 2022-06-23
Supplement: MOESM16 [file 42255_2022_585_MOESM16_ESM.xlsx]

## Sheet: Extended Data Fig. 7
Extended Data Fig.7a		Veh					rhCCL18
	CTCF	1.19025	0.796367	1.174	0.870937	0.895794	0.859465	0.790631	1.21511	0.986616	1.02199
	EP300	1.38883	0.909855	1.20888	0.982173	0.612849	0.948537	1.04541	0.699294	0.733939	0.872856
	UBTF	0.741373	1.01227	1.10775	0.971434	0.938075	1.93597	1.6737	2.0602	1.78067	1.55033
	MAX	1.1406	0.894875	1.0138	1.10184	0.972405	1	1.07917	0.594612	0.993101	1.03515
	GABPA	1.32832	0.876151	0.894193	0.900958	1.04191	1.22233	1.10167	1.04868	1.3847	1.28209
	TRIM22	0.803165	0.718868	0.872774	0.975165	1.19229	0.988789	1.23444	1.13588	1.1842	1.09714
	CUX1	1.33841	0.864592	0.920601	1.03584	0.993348	0.829828	0.795708	0.641845	0.939914	0.895494
	CHD1	1.25207	0.11157	0.161157	0.570248	0.297521	0.892562	0.123967	0.210744	0.235537	0.0743802
	ZNF207	1.24838	0.846041	1.07165	1.04909	0.864842	1.0353	0.913725	1.05661	0.876123	0.946313
	STAT5A	0.963897	0.751056	0.862703	1.13048	0.984135	0.931203	0.924754	1.26325	0.816221	0.78842
	RFX5	1.17743	0.92385	1.12172	1.01804	0.943378	2.45175	3.14649	2.68281	2.07595	2.73916
	NBN	1.17785	0.680537	1.03893	0.990604	0.98255	0.924161	0.897987	1.21007	0.910067	0.771141
	NRF1	1.12489	0.721792	0.757967	1.22308	0.940568	0.945736	0.919897	1.52627	0.888889	0.900947
	RAD21	0.810566	0.769811	1.01887	1.34943	1.01887	1.63019	1.15472	1.56226	0.733585	0.710943
	ASH2L	0.571429	0.628571	1.26531	1.61361	0.748299	1.03401	0.998639	1.51565	0.606803	0.590476
	ARID3A	0.998021	0.869284	1.15488	1.07739	1.01927	1.17113	0.938027	0.918654	0.931153	0.912405
	HCFC1	0.751211	0.745993	1.04046	1.4311	0.868751	1.31679	1.31679	2.23003	0.88714	0.593415
	MTA2	0.751211	0.745993	1.04046	1.4311	0.868751	1.31679	1.31679	2.23003	0.88714	0.593415
	IKZF2	0.910728	0.837807	0.886072	1.07546	1.16884	0.917024	1.38026	1.60794	1.09067	0.989945
	IKZF1	0.779221	1.14286	0.883117	2.05195	0.857143	1.14286	1.50649	0.649351	0.909091	0.831169
		Con					RA
Extended Data Fig.7b	CTCF	1.07792	0.971666	0.881583	1.20496	0.863874	2.31136	1.63459	1.72775	1.21266	1.95719
	EP300	1.34828	1.38629	0.747995	0.779736	0.737694	0.722519	0.590962	1.02893	1.00081	0.496715
	UBTF	0.887448	0.955406	1.03935	0.720885	1.39691	2.50466	1.50173	1.49596	1.34983	1.49907
	MAX	0.479848	0.927043	1.23181	0.94648	1.41482	0.642026	0.914293	1.69424	1.10244	0.901698
	GABPA	1.26628	0.660358	1.04294	0.824176	1.20625	2.6221	2.25122	2.17491	1.23168	3.20615
	TRIM22	1.39706	0.657203	0.876904	0.606693	1.46214	2.35154	1.87355	1.86732	1.49715	2.79505
	CUX1	0.76572	1.76652	0.718361	1.05729	0.692115	1.04987	0.809084	1.42759	1.45213	0.306402
	CHD1	0.445694	0.775999	0.298153	0.354566	3.12559	1.13613	1.68661	2.75896	0.398908	0.194
	ZNF207	3.31953	0.348159	0.544692	0.384898	0.402718	0.269255	0.68904	0.66557	0.394792	0.897436
	STAT5A	1.5066	0.84753	0.642213	0.960214	1.04344	0.629081	1.32986	1.94705	1.05799	0.128656
	RFX5	1.45865	0.699538	1.15229	1.04571	0.643811	3.12635	3.06215	2.41911	2.57499	2.43606
	NBN	1.85185	0.555556	1.66667	0.37037	0.555556	0.555556	0.925926	1.2963	2.96296	0.37037
	NRF1	1.37017	0.853549	0.842318	0.813118	1.12084	1.74528	0.256065	2.30234	1.22642	1.04447
	RAD21	0.877466	1.01765	1.12669	0.809969	1.16822	2.36241	2.32087	1.76532	2.26376	2.45067
	ASH2L	0.992754	0.797101	1.07246	1.02899	1.1087	1.34783	0.217391	1.48551	0.65942	1.05797
	ARID3A	1.79636	0.776594	0.787459	0.69019	0.9494	0.661993	0.617757	0.855753	1.12893	1.92519
	HCFC1	0.791903	2.05591	0.895732	0.56323	0.693225	2.75557	0.168319	0.494787	0.613963	0.29487
	MTA2	1.21509	0.824091	0.940257	0.727354	1.29321	1.03578	2.28285	1.34826	1.20659	1.0799
	IKZF2	0.398505	0.539347	0.318133	2.1339	1.61011	1.49314	0.657847	0.738981	0.640384	0.336053
	IKZF1	1.26461	0.929988	1.16933	0.777906	0.858166	0.644551	0.754651	1.01375	0.60936	0.794575
